# Supplementary material
Source: publisher figshare collection journal article supplement (https://asha.figshare.com/articles/dataset/_/28462613)
Supplement: Supplementary file 1 [file 1]

**Supplemental Material S1.** Survey evaluating caregiver perceptions of the community hearing screening, the referral process, and treatment outcomes.

**Participant number:**

**Relationship to the child:**

**Caregiver Survey**

**Survey evaluating the impact of a community-based hearing screening programme**

| Section A: For all participants:                                                                                                                                                                                 |                                                       |            |        |
|------------------------------------------------------------------------------------------------------------------------------------------------------------------------------------------------------------------|-------------------------------------------------------|------------|--------|
| Questions                                                                                                                                                                                                        | Yes (1)                                               | Unsure (2) | No (3) |
| <i>The first set of questions require you to answer with either a yes / unsure / no answer:</i>                                                                                                                  |                                                       |            |        |
| 1. Was your child's hearing screened at or shortly after birth?                                                                                                                                                  |                                                       |            |        |
| 2. Was your child's hearing screened for the first time at their school, by the 3E hearing screening programme?                                                                                                  |                                                       |            |        |
| 3. Your child's hearing was screened at his/her school with your informed consent. Did you receive information explaining the hearing screening?                                                                 |                                                       |            |        |
| 4. Are you aware of the results of your child's hearing screening at his/her school?                                                                                                                             |                                                       |            |        |
| 5. Were you concerned about your child's hearing or speech and language development before the hearing screening at his/her school?                                                                              |                                                       |            |        |
| 6. After the hearing screening was done at your child's school it was recommended that you bring your child for a follow-up appointment at the hospital/clinic. Did you understand what you were supposed to do? |                                                       |            |        |
| 7. Were you present during your child's follow-up appointment at the hospital/clinic?                                                                                                                            |                                                       |            |        |
| 8. Did the person at the hospital who did the hearing test explain the results to you after the test?                                                                                                            |                                                       |            |        |
| 9. Did you understand the hearing test results you received at the hospital/clinic?                                                                                                                              |                                                       |            |        |
| 10. Did the 3E screening programme help your child?                                                                                                                                                              |                                                       |            |        |
| 11. Did the visit to the hospital/clinic help your child?                                                                                                                                                        |                                                       |            |        |
| <i>The following questions requires your own answer:</i>                                                                                                                                                         |                                                       |            |        |
| 12. Tell me about your experience of the school hearing screening, hospital/clinic testing and treatment received?                                                                                               | -prompt question: What challenges did you experience? |            |        |

|                                                                                                                     |                                                                                                                                                     |
|---------------------------------------------------------------------------------------------------------------------|-----------------------------------------------------------------------------------------------------------------------------------------------------|
| 13. In your opinion, how do you think services for ears and hearing can be made easier for people in the community? | -prompt question: Any other comments you would like to make that may help the development of future hearing screening programmes in your community? |
|---------------------------------------------------------------------------------------------------------------------|-----------------------------------------------------------------------------------------------------------------------------------------------------|

| <b>Section B: If the child did not receive hearing aids/assistive listening devices as part of their intervention:</b>             |                                                                       |
|------------------------------------------------------------------------------------------------------------------------------------|-----------------------------------------------------------------------|
| <i>The following questions requires your own answer:</i>                                                                           |                                                                       |
| 14. In your opinion, tell me about any changes you saw in your child after he/she received treatment for his/her hearing problems? | -prompt question: Did your child benefit from the treatment received? |

| <b>Section C: If the child did receive hearing aids as part of their intervention:</b>                       |                                                                                                                               |            |        |
|--------------------------------------------------------------------------------------------------------------|-------------------------------------------------------------------------------------------------------------------------------|------------|--------|
| Questions                                                                                                    | Yes (1)                                                                                                                       | Unsure (2) | No (3) |
| <i>The first set of questions require you to answer with either a yes / unsure / no answer:</i>              |                                                                                                                               |            |        |
| 14. Does your child wear his/her hearing aids?                                                               |                                                                                                                               |            |        |
| 15. If YES, is your child benefitting from his/her hearing aids?                                             |                                                                                                                               |            |        |
| <i>The following questions requires your own answer:</i>                                                     |                                                                                                                               |            |        |
| 16. If YES in Q. 15, tell me about any changes you saw since your child got hearing aids?                    | -prompt question: What has your child gained from the hearing aids? What is different now that he/ she is using hearing aids? |            |        |
| 17. If YES in Q. 15, tell me how you feel about your child's hearing aids?                                   |                                                                                                                               |            |        |
| 18. If NO in Q. 14, what are the reasons for your child not wearing (using) his/ her hearing aid(s) anymore? |                                                                                                                               |            |        |
