# Supplementary material
Source: publisher figshare collection journal article supplement (https://asha.figshare.com/articles/dataset/_/28462613)
Supplement: Supplementary file 2 [file 1]

## Supplemental Material S2. Survey investigating caregivers' reasons for follow-up default.

Participant number:

Relationship to the child:

### Caregiver Survey Survey investigating caregivers' reasons for follow-up default

| Section A: For all participants:                                                                                                                  |         |         |            |        |
|---------------------------------------------------------------------------------------------------------------------------------------------------|---------|---------|------------|--------|
| Questions                                                                                                                                         | N/A (0) | Yes (1) | Unsure (2) | No (3) |
| <i>The first set of questions require you to answer with either a yes / unsure / no answer:</i>                                                   |         |         |            |        |
| 1. Was your child's hearing screened at or shortly after birth?                                                                                   |         |         |            |        |
| 2. Your child's hearing was screened at his/ her school with your informed consent. Did you receive information explaining the hearing screening? |         |         |            |        |
| 3. Are you aware of the results of your child's hearing screening at his/her school?                                                              |         |         |            |        |
| 4. Do you have any concerns about your child's hearing?                                                                                           |         |         |            |        |
| 5. Do you have any concerns about your child's speech and language development?                                                                   |         |         |            |        |
| 6. Are you aware of the negative impact hearing loss can have on a child's development?                                                           |         |         |            |        |
| 7. It was recommended that you bring your child for a follow-up appointment at the clinic/hospital. Are you aware of this?                        |         |         |            |        |

| Section B: If the caregiver received the date and time of the follow-up appointment at the hospital (answered YES in Section A, Q. 7): |                                                                                                                              |            |        |
|----------------------------------------------------------------------------------------------------------------------------------------|------------------------------------------------------------------------------------------------------------------------------|------------|--------|
| Questions                                                                                                                              | Yes (1)                                                                                                                      | Unsure (2) | No (3) |
| <i>The first set of questions require you to answer with either a yes / unsure / no answer:</i>                                        |                                                                                                                              |            |        |
| 8. Did you know the reason for your child's appointment at the clinic/hospital?                                                        |                                                                                                                              |            |        |
| 9. Would you be interested in bringing your child for a follow-up retest?                                                              |                                                                                                                              |            |        |
| <i>The following questions requires your own answer:</i>                                                                               |                                                                                                                              |            |        |
| 10. If NO in Q. 9, why not?                                                                                                            | -prompts: costs involved, not necessary                                                                                      |            |        |
| 11. How did you receive information about the appointment at the clinic/hospital?                                                      | -prompts: written feedback (letter), phonecall, whatsapp, teacher informed me, health professional (audiologist) informed me |            |        |

|                                                                                                                     |                                                                                                                                                   |
|---------------------------------------------------------------------------------------------------------------------|---------------------------------------------------------------------------------------------------------------------------------------------------|
| 12. What are the reasons why you did not attend your child's appointment at the clinic/hospital?                    | -prompt question: What challenges did you experience?                                                                                             |
| 13. In your opinion, how do you think services for ears and hearing can be made easier for people in the community? | -prompt question: Any other comments you would like to make that may help the development of future hearing screening programs in your community? |

| Section C: If the caregiver did not receive the date and time of the follow-up appointment at the hospital (answered NO or UNSURE in Section A, Q. 7): |                                                                                                                                                   |            |        |
|--------------------------------------------------------------------------------------------------------------------------------------------------------|---------------------------------------------------------------------------------------------------------------------------------------------------|------------|--------|
| Questions                                                                                                                                              | Yes (1)                                                                                                                                           | Unsure (2) | No (3) |
| <i>The first set of questions require you to answer with either a yes / unsure / no answer:</i>                                                        |                                                                                                                                                   |            |        |
| 8. Would you be interested in bringing your child for a follow-up retest?                                                                              |                                                                                                                                                   |            |        |
| <i>The following questions requires your own answer:</i>                                                                                               |                                                                                                                                                   |            |        |
| 9. If NO in Q. 8, why not?                                                                                                                             | -prompts: costs involved, not necessary                                                                                                           |            |        |
| 10. In your opinion, how do you think services for ears and hearing can be made easier for people in the community?                                    | -prompt question: Any other comments you would like to make that may help the development of future hearing screening programs in your community? |            |        |
